# Supplementary material for: Metabolic engineering strategies to produce medium-chain oleochemicals via acyl-ACP:CoA transacylase activity
Source: Research Square preprint supplement (doi:10.21203/rs.3.rs-842403/v1), 2021-08-27
Supplement: Supplementary file 2 [file 42607acc24d8052278e906f2.xlsx]

## Sheet: Reactions
	Description	Reaction	Lower Bound	Upper Bound
TER04	acyl-CoA dehydrogenase (butanoyl-CoA)	btcoa_c + nad_c <=> b2coa_c + h_c + nadh_c	-1000	1000
TER06	acyl-CoA dehydrogenase (hexanoyl-CoA)	hxcoa_c + nad_c <=> h_c + hx2coa_c + nadh_c	-1000	1000
TER08	acyl-CoA dehydrogenase (octanoyl-CoA)	nad_c + occoa_c <=> h_c + nadh_c + oc2coa_c	-1000	1000
TER10	acyl-CoA dehydrogenase (decanoyl-CoA)	dcacoa_c + nad_c <=> dc2coa_c + h_c + nadh_c	-1000	1000
TER12	acyl-CoA dehydrogenase (dodecanoyl-CoA)	ddcacoa_c + nad_c <=> dd2coa_c + h_c + nadh_c	-1000	1000
TER14	acyl-CoA dehydrogenase (tetradecanoyl-CoA)	nad_c + tdcoa_c <=> h_c + nadh_c + td2coa_c	-1000	1000
TER16	acyl-CoA dehydrogenase (hexadecanoyl-CoA)	nad_c + pmtcoa_c <=> h_c + hdd2coa_c + nadh_c	-1000	1000
TER18	acyl-CoA dehydrogenase (octadecanoyl-CoA)	nad_c + stcoa_c <=> h_c + nadh_c + od2coa_c	-1000	1000
TE_C040_ACP	Butryl-ACP Thioesterase	butACP_c + h2o_c --> ACP_c + but_c + h_c	0	1000
TE_C060_ACP	Hexanoyl-ACP Thioesterase	h2o_c + hexACP_c --> ACP_c + h_c + hxa_c	0	1000
TE_C080_ACP	Octanoyl-ACP Thioesterase	h2o_c + ocACP_c --> ACP_c + h_c + octa_c	0	1000
TE_C100_ACP	Decanoyl-ACP Thioesterase	dcaACP_c + h2o_c --> ACP_c + dca_c + h_c	0	1000
TE_C101_ACP	Decenoyl-ACP Thioesterase	cdec3eACP_c + h2o_c --> ACP_c + FFA_C101_c + h_c	0	1000
TE_C120_ACP	Dodecanoyl-ACP thioesterase	ddcaACP_c + h2o_c --> ACP_c + ddca_c + h_c	0	1000
TE_C121_ACP	Dodecenoyl-ACP thioesterase	cddec5eACP_c + h2o_c --> ACP_c + FFA_C121_c + h_c	0	1000
TE_C140_ACP	Tetradecanoyl-ACP thioesterase	h2o_c + myrsACP_c --> ACP_c + h_c + ttdca_c	0	1000
TE_C141_ACP	Tetradecenoyl-ACP thioesterase	h2o_c + tdeACP_c --> ACP_c + h_c + ttdcea_c	0	1000
TE_C160_ACP	Hexadacanoyl-ACP Thioesterase	h2o_c + palmACP_c --> ACP_c + h_c + hdca_c	0	1000
TE_C161_ACP	Hexadecenoyl-ACP Thioesterase	h2o_c + hdeACP_c --> ACP_c + h_c + hdcea_c	0	1000
TE_C180_ACP	Octadecanoyl-ACP Thioesterase	h2o_c + ocdcaACP_c --> ACP_c + h_c + ocdca_c	0	1000
TE_C181_ACP	Octadecenoyl-ACP Thioesterase	h2o_c + octeACP_c --> ACP_c + h_c + ocdcea_c	0	1000
EX_FFA_C101_LPAREN_e_RPAREN_	Decenenoate (n-C10:1) exchange	FFA_C101_e -->	0	1000
EX_FFA_C121_LPAREN_e_RPAREN_	Dodecenoate (n-C12:1) exchange	FFA_C121_e -->	0	1000
Exp_FFA_C040	Butyrate excretion by acrAB-tolC	but_c --> but_e	0	1000
Exp_FFA_C060	Hexanoate excretion by acrAB-tolC	hxa_c --> hxa_e	0	1000
Exp_FFA_C080	Octanoate excretion by acrAB-tolC	octa_c --> octa_e	0	1000
Exp_FFA_C100	Decanoate excretion by acrAB-tolC	dca_c --> dca_e	0	1000
Exp_FFA_C101	Decenoate excretion by acrAB-tolC	FFA_C101_c --> FFA_C101_e	0	1000
Exp_FFA_C120	dodecanoate excretion by acrAB-tolC	ddca_c --> ddca_e	0	1000
Exp_FFA_C121	Dodecenoate excretion by acrAB-tolC	FFA_C121_c --> FFA_C121_e	0	1000
Exp_FFA_C140	Tetradecanoate excretion by acrAB-tolC	ttdca_c --> ttdca_e	0	1000
Exp_FFA_C141	Tetradecenoate excretion by acrAB-tolC	ttdcea_c --> ttdcea_e	0	1000
Exp_FFA_C160	hexadecanoate excretion by acrAB-tolC	hdca_c --> hdca_e	0	1000
Exp_FFA_C161	hexadecenoate excretion by acrAB-tolC	hdcea_c --> hdcea_e	0	1000
Exp_FFA_C180	octadecanoate excretion by acrAB-tolC	ocdca_c --> ocdca_e	0	1000
Exp_FFA_C181	octadecenoate excretion by acrAB-tolC	ocdcea_c --> ocdcea_e	0	1000
Dif_Perip_FFA_C040	Butyrate insertion into IM (Periplasm for FadD)	but_c --> but_p	0	1000
Dif_Perip_FFA_C060	Hexanoate insertion into IM (Periplasm for FadD)	hxa_c --> hxa_p	0	1000
Dif_Perip_FFA_C080	Octanoate insertion into IM (Periplasm for FadD)	octa_c --> octa_p	0	1000
Dif_Perip_FFA_C100	Decanoate insertion into IM (Periplasm for FadD)	dca_c --> dca_p	0	1000
Dif_Perip_FFA_C101	Decenoate insertion into IM (Periplasm for FadD)	FFA_C121_c --> FFA_C121_p	0	1000
Dif_Perip_FFA_C120	dodecanoate insertion into IM (Periplasm for FadD)	ddca_c --> ddca_p	0	1000
Dif_Perip_FFA_C121	Dodecenoate insertion into IM (Periplasm for FadD)	FFA_C101_c --> FFA_C101_p	0	1000
Dif_Perip_FFA_C140	Tetradecanoate insertion into IM (Periplasm for FadD)	ttdca_c --> ttdca_p	0	1000
Dif_Perip_FFA_C141	Tetradecenoate insertion into IM (Periplasm for FadD)	ttdcea_c --> ttdcea_p	0	1000
Dif_Perip_FFA_C160	hexadecanoate insertion into IM (Periplasm for FadD)	hdca_c --> hdca_p	0	1000
Dif_Perip_FFA_C161	hexadecenoate insertion into IM (Periplasm for FadD)	hdcea_c --> hdcea_p	0	1000
Dif_Perip_FFA_C180	ocradecanoate insertion into IM (Periplasm for FadD)	ocdca_c --> ocdca_p	0	1000
Dif_Perip_FFA_C181	octadecenoate insertion into IM (Periplasm for FadD)	ocdcea_c --> ocdcea_p	0	1000
ACR_C040	Acyl-CoA Reductase on (n-C4:0)	btcoa_c + h_c + nadph_c --> Ald_C040_c + coa_c + nadp_c	0	1000
ACR_C060	Acyl-CoA Reductase on (n-C6:0)	h_c + hxcoa_c + nadph_c --> Ald_C060_c + coa_c + nadp_c	0	1000
ACR_C080	Acyl-CoA Reductase on (n-C8:0)	h_c + nadph_c + occoa_c --> Ald_C080_c + coa_c + nadp_c	0	1000
ACR_C100	Acyl-CoA Reductase on (n-C10:0)	dcacoa_c + h_c + nadph_c --> Ald_C100_c + coa_c + nadp_c	0	1000
ACR_C101	Acyl-CoA Reductase on (n-C10:1)	dc3coa_c + h_c + nadph_c --> Ald_C101_c + coa_c + nadp_c	0	1000
ACR_C120	Acyl-CoA Reductase on (n-C12:0)	ddcacoa_c + h_c + nadph_c --> Ald_C120_c + coa_c + nadp_c	0	1000
ACR_C121	Acyl-CoA Reductase on (n-C12:1)	dd3coa_c + h_c + nadph_c --> Ald_C121_c + coa_c + nadp_c	0	1000
ACR_C140	Acyl-CoA Reductase on (n-C14:0)	h_c + nadph_c + tdcoa_c --> Ald_C140_c + coa_c + nadp_c	0	1000
ACR_C141	Acyl-CoA Reductase on (n-C14:1)	h_c + nadph_c + tdecoa_c --> Ald_C141_c + coa_c + nadp_c	0	1000
ACR_C160	Acyl-CoA Reductase on (n-C16:0)	h_c + nadph_c + pmtcoa_c --> Ald_C160_c + coa_c + nadp_c	0	1000
ACR_C161	Acyl-CoA Reductase on (n-C16:1)	h_c + hdcoa_c + nadph_c --> Ald_C161_c + coa_c + nadp_c	0	1000
ACR_C180	Acyl-CoA Reductase on (n-C18:0)	h_c + nadph_c + stcoa_c --> Ald_C180_c + coa_c + nadp_c	0	1000
ACR_C181	Acyl-CoA Reductase on (n-C18:1)	h_c + nadph_c + odecoa_c --> Ald_C181_c + coa_c + nadp_c	0	1000
ALR_C040	Aldehyde Reductase on (n-C4:0)	Ald_C040_c + h_c + nadph_c <=> OH_C040_c + nadp_c	-1000	1000
ALR_C060	Aldehyde Reductase on (n-C6:0)	Ald_C060_c + h_c + nadph_c <=> OH_C060_c + nadp_c	-1000	1000
ALR_C080	Aldehyde Reductase on (n-C8:0)	Ald_C080_c + h_c + nadph_c <=> OH_C080_c + nadp_c	-1000	1000
ALR_C100	Aldehyde Reductase on (n-C10:0)	Ald_C100_c + h_c + nadph_c <=> OH_C100_c + nadp_c	-1000	1000
ALR_C101	Aldehyde Reductase on (n-C10:1)	Ald_C101_c + h_c + nadph_c <=> OH_C101_c + nadp_c	-1000	1000
ALR_C120	Aldehyde Reductase on (n-C12:0)	Ald_C120_c + h_c + nadph_c <=> OH_C120_c + nadp_c	-1000	1000
ALR_C121	Aldehyde Reductase on (n-C12:1)	Ald_C121_c + h_c + nadph_c <=> OH_C121_c + nadp_c	-1000	1000
ALR_C140	Aldehyde Reductase on (n-C14:0)	Ald_C140_c + h_c + nadph_c <=> OH_C140_c + nadp_c	-1000	1000
ALR_C141	Aldehyde Reductase on (n-C14:1)	Ald_C141_c + h_c + nadph_c <=> OH_C141_c + nadp_c	-1000	1000
ALR_C160	Aldehyde Reductase on (n-C16:0)	Ald_C160_c + h_c + nadph_c <=> OH_C160_c + nadp_c	-1000	1000
ALR_C161	Aldehyde Reductase on (n-C16:1)	Ald_C161_c + h_c + nadph_c <=> OH_C161_c + nadp_c	-1000	1000
ALR_C180	Aldehyde Reductase on (n-C18:0)	Ald_C180_c + h_c + nadph_c <=> OH_C180_c + nadp_c	-1000	1000
ALR_C181	Aldehyde Reductase on (n-C18:1)	Ald_C181_c + h_c + nadph_c <=> OH_C181_c + nadp_c	-1000	1000
EX_OH_C040_LPAREN_e_RPAREN_	Fatty alcohol (n-C4:0) exchange	OH_C040_e -->	0	1000
EX_OH_C060_LPAREN_e_RPAREN_	Fatty alcohol (n-C6:0) exchange	OH_C060_e -->	0	1000
EX_OH_C080_LPAREN_e_RPAREN_	Fatty alcohol (n-C8:0) exchange	OH_C080_e -->	0	1000
EX_OH_C100_LPAREN_e_RPAREN_	Fatty alcohol (n-C10:0) exchange	OH_C100_e -->	0	1000
EX_OH_C101_LPAREN_e_RPAREN_	Fatty alcohol (n-C10:1) exchange	OH_C101_e -->	0	1000
EX_OH_C120_LPAREN_e_RPAREN_	Fatty alcohol (n-C12:0) exchange	OH_C120_e -->	0	1000
EX_OH_C121_LPAREN_e_RPAREN_	Fatty alcohol (n-C12:1) exchange	OH_C121_e -->	0	1000
EX_OH_C140_LPAREN_e_RPAREN_	Fatty alcohol (n-C14:0) exchange	OH_C140_e -->	0	1000
EX_OH_C141_LPAREN_e_RPAREN_	Fatty alcohol (n-C14:1) exchange	OH_C141_e -->	0	1000
EX_OH_C160_LPAREN_e_RPAREN_	Fatty alcohol (n-C16:0) exchange	OH_C160_e -->	0	1000
EX_OH_C161_LPAREN_e_RPAREN_	Fatty alcohol (n-C16:1) exchange	OH_C161_e -->	0	1000
EX_OH_C180_LPAREN_e_RPAREN_	Fatty alcohol (n-C18:0) exchange	OH_C180_e -->	0	1000
EX_OH_C181_LPAREN_e_RPAREN_	Fatty alcohol (n-C18:1) exchange	OH_C181_e -->	0	1000
Exp_OH_C040_LPAREN_e_RPAREN_	Fatty alcohol (n-C4:0) facilitated export	OH_C040_c <=> OH_C040_e	-1000	1000
Exp_OH_C060_LPAREN_e_RPAREN_	Fatty alcohol (n-C6:0) facilitated export	OH_C060_c <=> OH_C060_e	-1000	1000
Exp_OH_C080_LPAREN_e_RPAREN_	Fatty alcohol (n-C8:0) facilitated export	OH_C080_c <=> OH_C080_e	-1000	1000
Exp_OH_C100_LPAREN_e_RPAREN_	Fatty alcohol (n-C10:0) facilitated export	OH_C100_c <=> OH_C100_e	-1000	1000
Exp_OH_C101_LPAREN_e_RPAREN_	Fatty alcohol (n-C10:1) facilitated export	OH_C101_c <=> OH_C101_e	-1000	1000
Exp_OH_C120_LPAREN_e_RPAREN_	Fatty alcohol (n-C12:0) facilitated export	OH_C120_c <=> OH_C120_e	-1000	1000
Exp_OH_C121_LPAREN_e_RPAREN_	Fatty alcohol (n-C12:1) facilitated export	OH_C121_c <=> OH_C121_e	-1000	1000
Exp_OH_C140_LPAREN_e_RPAREN_	Fatty alcohol (n-C14:0) facilitated export	OH_C140_c <=> OH_C140_e	-1000	1000
Exp_OH_C141_LPAREN_e_RPAREN_	Fatty alcohol (n-C14:1) facilitated export	OH_C141_c <=> OH_C141_e	-1000	1000
Exp_OH_C160_LPAREN_e_RPAREN_	Fatty alcohol (n-C16:0) facilitated export	OH_C160_c <=> OH_C160_e	-1000	1000
Exp_OH_C161_LPAREN_e_RPAREN_	Fatty alcohol (n-C16:1) facilitated export	OH_C161_c <=> OH_C161_e	-1000	1000
Exp_OH_C180_LPAREN_e_RPAREN_	Fatty alcohol (n-C18:0) facilitated export	OH_C180_c <=> OH_C180_e	-1000	1000
Exp_OH_C181_LPAREN_e_RPAREN_	Fatty alcohol (n-C18:1) facilitated export	OH_C181_c <=> OH_C181_e	-1000	1000
WSDGAT_C040	Ethyl Ester Synthesis for (n-C040 acyl-CoA)	btcoa_c + etoh_c --> EE_C040_c + coa_c	0	1000
WSDGAT_C060	Ethyl Ester Synthesis for (n-C060 acyl-CoA)	etoh_c + hxcoa_c --> EE_C060_c + coa_c	0	1000
WSDGAT_C080	Ethyl Ester Synthesis for (n-C080 acyl-CoA)	etoh_c + occoa_c --> EE_C080_c + coa_c	0	1000
WSDGAT_C100	Ethyl Ester Synthesis for (n-C100 acyl-CoA)	dcacoa_c + etoh_c --> EE_C100_c + coa_c	0	1000
WSDGAT_C101	Ethyl Ester Synthesis for (n-C101 acyl-CoA)	dc3coa_c + etoh_c --> EE_C101_c + coa_c	0	1000
WSDGAT_C120	Ethyl Ester Synthesis for (n-C120 acyl-CoA)	ddcacoa_c + etoh_c --> EE_C120_c + coa_c	0	1000
WSDGAT_C121	Ethyl Ester Synthesis for (n-C121 acyl-CoA)	dd3coa_c + etoh_c --> EE_C121_c + coa_c	0	1000
WSDGAT_C140	Ethyl Ester Synthesis for (n-C140 acyl-CoA)	etoh_c + tdcoa_c --> EE_C140_c + coa_c	0	1000
WSDGAT_C141	Ethyl Ester Synthesis for (n-C141 acyl-CoA)	etoh_c + tdecoa_c --> EE_C141_c + coa_c	0	1000
WSDGAT_C160	Ethyl Ester Synthesis for (n-C160 acyl-CoA)	etoh_c + pmtcoa_c --> EE_C160_c + coa_c	0	1000
WSDGAT_C161	Ethyl Ester Synthesis for (n-C161 acyl-CoA)	etoh_c + hdcoa_c --> EE_C161_c + coa_c	0	1000
WSDGAT_C180	Ethyl Ester Synthesis for (n-C180 acyl-CoA)	etoh_c + stcoa_c --> EE_C180_c + coa_c	0	1000
WSDGAT_C181	Ethyl Ester Synthesis for (n-C181 acyl-CoA)	etoh_c + odecoa_c --> EE_C181_c + coa_c	0	1000
Exp_EE_C040	Ethyl Ester (n-C040) facilitated export	EE_C040_c <=> EE_C040_e	-1000	1000
Exp_EE_C060	Ethyl Ester (n-C060) facilitated export	EE_C060_c <=> EE_C060_e	-1000	1000
Exp_EE_C080	Ethyl Ester (n-C080) facilitated export	EE_C080_c <=> EE_C080_e	-1000	1000
Exp_EE_C100	Ethyl Ester (n-C100) facilitated export	EE_C100_c <=> EE_C100_e	-1000	1000
Exp_EE_C101	Ethyl Ester (n-C101) facilitated export	EE_C101_c <=> EE_C101_e	-1000	1000
Exp_EE_C120	Ethyl Ester (n-C120) facilitated export	EE_C120_c <=> EE_C120_e	-1000	1000
Exp_EE_C121	Ethyl Ester (n-C121) facilitated export	EE_C121_c <=> EE_C121_e	-1000	1000
Exp_EE_C140	Ethyl Ester (n-C140) facilitated export	EE_C140_c <=> EE_C140_e	-1000	1000
Exp_EE_C141	Ethyl Ester (n-C141) facilitated export	EE_C141_c <=> EE_C141_e	-1000	1000
Exp_EE_C160	Ethyl Ester (n-C160) facilitated export	EE_C160_c <=> EE_C160_e	-1000	1000
Exp_EE_C161	Ethyl Ester (n-C161) facilitated export	EE_C161_c <=> EE_C161_e	-1000	1000
Exp_EE_C180	Ethyl Ester (n-C180) facilitated export	EE_C180_c <=> EE_C180_e	-1000	1000
Exp_EE_C181	Ethyl Ester (n-C181) facilitated export	EE_C181_c <=> EE_C181_e	-1000	1000
EX_EE_C040_LPAREN_e_RPAREN_	Ethyl Ester (n-C040) Exchange	EE_C040_e -->	0	1000
EX_EE_C060_LPAREN_e_RPAREN_	Ethyl Ester (n-C060) Exchange	EE_C060_e -->	0	1000
EX_EE_C080_LPAREN_e_RPAREN_	Ethyl Ester (n-C080) Exchange	EE_C080_e -->	0	1000
EX_EE_C100_LPAREN_e_RPAREN_	Ethyl Ester (n-C100) Exchange	EE_C100_e -->	0	1000
EX_EE_C101_LPAREN_e_RPAREN_	Ethyl Ester (n-C101) Exchange	EE_C101_e -->	0	1000
EX_EE_C120_LPAREN_e_RPAREN_	Ethyl Ester (n-C120) Exchange	EE_C120_e -->	0	1000
EX_EE_C121_LPAREN_e_RPAREN_	Ethyl Ester (n-C121) Exchange	EE_C121_e -->	0	1000
EX_EE_C140_LPAREN_e_RPAREN_	Ethyl Ester (n-C140) Exchange	EE_C140_e -->	0	1000
EX_EE_C141_LPAREN_e_RPAREN_	Ethyl Ester (n-C141) Exchange	EE_C141_e -->	0	1000
EX_EE_C160_LPAREN_e_RPAREN_	Ethyl Ester (n-C160) Exchange	EE_C160_e -->	0	1000
EX_EE_C161_LPAREN_e_RPAREN_	Ethyl Ester (n-C161) Exchange	EE_C161_e -->	0	1000
EX_EE_C180_LPAREN_e_RPAREN_	Ethyl Ester (n-C180) Exchange	EE_C180_e -->	0	1000
EX_EE_C181_LPAREN_e_RPAREN_	Ethyl Ester (n-C181) Exchange	EE_C181_e -->	0	1000
ADO_C040	Aldehyde-Deformylating Oxygenase on (n-C4:0)	Ald_C040_c + h_c + 2.0 nadh_c + o2_c --> alk_C040_c + for_c + h2o_c + 2.0 nad_c	0	1000
ADO_C060	Aldehyde-Deformylating Oxygenase on (n-C6:0)	Ald_C060_c + h_c + 2.0 nadh_c + o2_c --> alk_C060_c + for_c + h2o_c + 2.0 nad_c	0	1000
ADO_C080	Aldehyde-Deformylating Oxygenase on (n-C8:0)	Ald_C080_c + h_c + 2.0 nadh_c + o2_c --> alk_C080_c + for_c + h2o_c + 2.0 nad_c	0	1000
ADO_C100	Aldehyde-Deformylating Oxygenase on (n-C10:0)	Ald_C100_c + h_c + 2.0 nadh_c + o2_c --> alk_C100_c + for_c + h2o_c + 2.0 nad_c	0	1000
ADO_C101	Aldehyde-Deformylating Oxygenase on (n-C10:1)	Ald_C101_c + h_c + 2.0 nadh_c + o2_c --> alk_C101_c + for_c + h2o_c + 2.0 nad_c	0	1000
ADO_C120	Aldehyde-Deformylating Oxygenase on (n-C12:0)	Ald_C120_c + h_c + 2.0 nadh_c + o2_c --> alk_C120_c + for_c + h2o_c + 2.0 nad_c	0	1000
ADO_C121	Aldehyde-Deformylating Oxygenase on (n-C12:1)	Ald_C121_c + h_c + 2.0 nadh_c + o2_c --> alk_C121_c + for_c + h2o_c + 2.0 nad_c	0	1000
ADO_C140	Aldehyde-Deformylating Oxygenase on (n-C14:0)	Ald_C140_c + h_c + 2.0 nadh_c + o2_c --> alk_C140_c + for_c + h2o_c + 2.0 nad_c	0	1000
ADO_C141	Aldehyde-Deformylating Oxygenase on (n-C14:1)	Ald_C141_c + h_c + 2.0 nadh_c + o2_c --> alk_C141_c + for_c + h2o_c + 2.0 nad_c	0	1000
ADO_C160	Aldehyde-Deformylating Oxygenase on (n-C16:0)	Ald_C160_c + h_c + 2.0 nadh_c + o2_c --> alk_C160_c + for_c + h2o_c + 2.0 nad_c	0	1000
ADO_C161	Aldehyde-Deformylating Oxygenase on (n-C16:1)	Ald_C161_c + h_c + 2.0 nadh_c + o2_c --> alk_C161_c + for_c + h2o_c + 2.0 nad_c	0	1000
ADO_C180	Aldehyde-Deformylating Oxygenase on (n-C18:0)	Ald_C180_c + h_c + 2.0 nadh_c + o2_c --> alk_C180_c + for_c + h2o_c + 2.0 nad_c	0	1000
ADO_C181	Aldehyde-Deformylating Oxygenase on (n-C18:1)	Ald_C181_c + h_c + 2.0 nadh_c + o2_c --> alk_C181_c + for_c + h2o_c + 2.0 nad_c	0	1000
EX_ALK_C040_LPAREN_e_RPAREN_	Alkane (n-C4:0) exchange	alk_C040_e -->	0	1000
EX_ALK_C060_LPAREN_e_RPAREN_	Alkane (n-C6:0) exchange	alk_C060_e -->	0	1000
EX_ALK_C080_LPAREN_e_RPAREN_	Alkane (n-C8:0) exchange	alk_C080_e -->	0	1000
EX_ALK_C100_LPAREN_e_RPAREN_	Alkane (n-C10:0) exchange	alk_C100_e -->	0	1000
EX_ALK_C101_LPAREN_e_RPAREN_	Alkane (n-C10:1) exchange	alk_C101_e -->	0	1000
EX_ALK_C120_LPAREN_e_RPAREN_	Alkane (n-C12:0) exchange	alk_C120_e -->	0	1000
EX_ALK_C121_LPAREN_e_RPAREN_	Alkane (n-C12:1) exchange	alk_C121_e -->	0	1000
EX_ALK_C140_LPAREN_e_RPAREN_	Alkane (n-C14:0) exchange	alk_C140_e -->	0	1000
EX_ALK_C141_LPAREN_e_RPAREN_	Alkane (n-C14:1) exchange	alk_C141_e -->	0	1000
EX_ALK_C160_LPAREN_e_RPAREN_	Alkane (n-C16:0) exchange	alk_C160_e -->	0	1000
EX_ALK_C161_LPAREN_e_RPAREN_	Alkane (n-C16:1) exchange	alk_C161_e -->	0	1000
EX_ALK_C180_LPAREN_e_RPAREN_	Alkane (n-C18:0) exchange	alk_C180_e -->	0	1000
EX_ALK_C181_LPAREN_e_RPAREN_	Alkane (n-C18:1) exchange	alk_C181_e -->	0	1000
Exp_ALK_C040	Alkane (n-C4:0) facilitated export	alk_C040_c <=> alk_C040_e	-1000	1000
Exp_ALK_C060	Alkane (n-C6:0) facilitated export	alk_C060_c <=> alk_C060_e	-1000	1000
Exp_ALK_C080	Alkane (n-C8:0) facilitated export	alk_C080_c <=> alk_C080_e	-1000	1000
Exp_ALK_C100	Alkane (n-C10:0) facilitated export	alk_C100_c <=> alk_C100_e	-1000	1000
Exp_ALK_C101	Alkane (n-C10:1) facilitated export	alk_C101_c <=> alk_C101_e	-1000	1000
Exp_ALK_C120	Alkane (n-C12:0) facilitated export	alk_C120_c <=> alk_C120_e	-1000	1000
Exp_ALK_C121	Alkane (n-C12:1) facilitated export	alk_C121_c <=> alk_C121_e	-1000	1000
Exp_ALK_C140	Alkane (n-C14:0) facilitated export	alk_C140_c <=> alk_C140_e	-1000	1000
Exp_ALK_C141	Alkane (n-C14:1) facilitated export	alk_C141_c <=> alk_C141_e	-1000	1000
Exp_ALK_C160	Alkane (n-C16:0) facilitated export	alk_C160_c <=> alk_C160_e	-1000	1000
Exp_ALK_C161	Alkane (n-C16:1) facilitated export	alk_C161_c <=> alk_C161_e	-1000	1000
Exp_ALK_C180	Alkane (n-C18:0) facilitated export	alk_C180_c <=> alk_C180_e	-1000	1000
Exp_ALK_C181	Alkane (n-C18:1) facilitated export	alk_C181_c <=> alk_C181_e	-1000	1000
FAMT_C040	Methyl Ester Synthesis for (n-C4:0 fatty acid)	amet_c + but_c --> ME_C040_c + ahcys_c	0	1000
FAMT_C060	Methyl Ester Synthesis for (n-C6:0 fatty acid)	amet_c + hxa_c --> ME_C060_c + ahcys_c	0	1000
FAMT_C080	Methyl Ester Synthesis for (n-C8:0 fatty acid)	amet_c + octa_c --> ME_C080_c + ahcys_c	0	1000
FAMT_C100	Methyl Ester Synthesis for (n-C10:0 fatty acid)	amet_c + dca_c --> ME_C100_c + ahcys_c	0	1000
FAMT_C101	Methyl Ester Synthesis for (n-C10:1 fatty acid)	FFA_C101_c + amet_c --> ME_C101_c + ahcys_c	0	1000
FAMT_C120	Methyl Ester Synthesis for (n-C12:0 fatty acid)	amet_c + ddca_c --> ME_C120_c + ahcys_c	0	1000
FAMT_C121	Methyl Ester Synthesis for (n-C12:1 fatty acid)	FFA_C121_c + amet_c --> ME_C121_c + ahcys_c	0	1000
FAMT_C140	Methyl Ester Synthesis for (n-C14:0 fatty acid)	amet_c + ttdca_c --> ME_C140_c + ahcys_c	0	1000
FAMT_C141	Methyl Ester Synthesis for (n-C14:1 fatty acid)	amet_c + ttdcea_c --> ME_C141_c + ahcys_c	0	1000
FAMT_C160	Methyl Ester Synthesis for (n-C16:0 fatty acid)	amet_c + hdca_c --> ME_C160_c + ahcys_c	0	1000
FAMT_C161	Methyl Ester Synthesis for (n-C16:1 fatty acid)	amet_c + hdcea_c --> ME_C161_c + ahcys_c	0	1000
FAMT_C180	Methyl Ester Synthesis for (n-C18:0 fatty acid)	amet_c + ocdca_c --> ME_C180_c + ahcys_c	0	1000
FAMT_C181	Methyl Ester Synthesis for (n-C18:1 fatty acid)	amet_c + ocdcea_c --> ME_C181_c + ahcys_c	0	1000
Exp_ME_C040	Methyl Ester (n-C4:0) facilitated export	ME_C040_c <=> ME_C040_e	-1000	1000
Exp_ME_C060	Methyl Ester (n-C6:0) facilitated export	ME_C060_c <=> ME_C060_e	-1000	1000
Exp_ME_C080	Methyl Ester (n-C8:0) facilitated export	ME_C080_c <=> ME_C080_e	-1000	1000
Exp_ME_C100	Methyl Ester (n-C10:0) facilitated export	ME_C100_c <=> ME_C100_e	-1000	1000
Exp_ME_C101	Methyl Ester (n-C10:1) facilitated export	ME_C101_c <=> ME_C101_e	-1000	1000
Exp_ME_C120	Methyl Ester (n-C12:0) facilitated export	ME_C120_c <=> ME_C120_e	-1000	1000
Exp_ME_C121	Methyl Ester (n-C12:1) facilitated export	ME_C121_c <=> ME_C121_e	-1000	1000
Exp_ME_C140	Methyl Ester (n-C14:0) facilitated export	ME_C140_c <=> ME_C140_e	-1000	1000
Exp_ME_C141	Methyl Ester (n-C14:1) facilitated export	ME_C141_c <=> ME_C141_e	-1000	1000
Exp_ME_C160	Methyl Ester (n-C16:0) facilitated export	ME_C160_c <=> ME_C160_e	-1000	1000
Exp_ME_C161	Methyl Ester (n-C16:1) facilitated export	ME_C161_c <=> ME_C161_e	-1000	1000
Exp_ME_C180	Methyl Ester (n-C18:0) facilitated export	ME_C180_c <=> ME_C180_e	-1000	1000
Exp_ME_C181	Methyl Ester (n-C18:1) facilitated export	ME_C181_c <=> ME_C181_e	-1000	1000
EX_ME_C040_LPAREN_e_RPAREN_	Methyl Ester (n-C4:0) exchange	ME_C040_e -->	0	1000
EX_ME_C060_LPAREN_e_RPAREN_	Methyl Ester (n-C6:0) exchange	ME_C060_e -->	0	1000
EX_ME_C080_LPAREN_e_RPAREN_	Methyl Ester (n-C8:0) exchange	ME_C080_e -->	0	1000
EX_ME_C100_LPAREN_e_RPAREN_	Methyl Ester (n-C10:0) exchange	ME_C100_e -->	0	1000
EX_ME_C101_LPAREN_e_RPAREN_	Methyl Ester (n-C10:1) exchange	ME_C101_e -->	0	1000
EX_ME_C120_LPAREN_e_RPAREN_	Methyl Ester (n-C12:0) exchange	ME_C120_e -->	0	1000
EX_ME_C121_LPAREN_e_RPAREN_	Methyl Ester (n-C12:1) exchange	ME_C121_e -->	0	1000
EX_ME_C140_LPAREN_e_RPAREN_	Methyl Ester (n-C14:0) exchange	ME_C140_e -->	0	1000
EX_ME_C141_LPAREN_e_RPAREN_	Methyl Ester (n-C14:1) exchange	ME_C141_e -->	0	1000
EX_ME_C160_LPAREN_e_RPAREN_	Methyl Ester (n-C16:0) exchange	ME_C160_e -->	0	1000
EX_ME_C161_LPAREN_e_RPAREN_	Methyl Ester (n-C16:1) exchange	ME_C161_e -->	0	1000
EX_ME_C180_LPAREN_e_RPAREN_	Methyl Ester (n-C18:0) exchange	ME_C180_e -->	0	1000
EX_ME_C181_LPAREN_e_RPAREN_	Methyl Ester (n-C18:1) exchange	ME_C181_e -->	0	1000
ATF_C040	Akyl-Acetate Ester Synthesis for (n-C040 acyl-CoA)	OH_C040_c + accoa_c --> AAE_C040_c + coa_c	0	1000
ATF_C060	Akyl-Acetate Ester Synthesis for (n-C060 acyl-CoA)	OH_C060_c + accoa_c --> AAE_C060_c + coa_c	0	1000
ATF_C080	Akyl-Acetate Ester Synthesis for (n-C080 acyl-CoA)	OH_C080_c + accoa_c --> AAE_C080_c + coa_c	0	1000
ATF_C100	Akyl-Acetate Ester Synthesis for (n-C100 acyl-CoA)	OH_C100_c + accoa_c --> AAE_C100_c + coa_c	0	1000
ATF_C101	Akyl-Acetate Ester Synthesis for (n-C101 acyl-CoA)	OH_C101_c + accoa_c --> AAE_C101_c + coa_c	0	1000
ATF_C120	Akyl-Acetate Ester Synthesis for (n-C120 acyl-CoA)	OH_C120_c + accoa_c --> AAE_C120_c + coa_c	0	1000
ATF_C121	Akyl-Acetate Ester Synthesis for (n-C121 acyl-CoA)	OH_C121_c + accoa_c --> AAE_C121_c + coa_c	0	1000
ATF_C140	Akyl-Acetate Ester Synthesis for (n-C140 acyl-CoA)	OH_C140_c + accoa_c --> AAE_C140_c + coa_c	0	1000
ATF_C141	Akyl-Acetate Ester Synthesis for (n-C141 acyl-CoA)	OH_C141_c + accoa_c --> AAE_C141_c + coa_c	0	1000
ATF_C160	Akyl-Acetate Ester Synthesis for (n-C160 acyl-CoA)	OH_C160_c + accoa_c --> AAE_C160_c + coa_c	0	1000
ATF_C161	Akyl-Acetate Ester Synthesis for (n-C161 acyl-CoA)	OH_C161_c + accoa_c --> AAE_C161_c + coa_c	0	1000
ATF_C180	Akyl-Acetate Ester Synthesis for (n-C180 acyl-CoA)	OH_C180_c + accoa_c --> AAE_C180_c + coa_c	0	1000
ATF_C181	Akyl-Acetate Ester Synthesis for (n-C181 acyl-CoA)	OH_C181_c + accoa_c --> AAE_C181_c + coa_c	0	1000
Exp_AAE_C040	Alkyl-Acetate Ester (n-C040) facilitated export	AAE_C040_c <=> AAE_C040_e	-1000	1000
Exp_AAE_C060	Alkyl-Acetate Ester (n-C060) facilitated export	AAE_C060_c <=> AAE_C060_e	-1000	1000
Exp_AAE_C080	Alkyl-Acetate Ester (n-C080) facilitated export	AAE_C080_c <=> AAE_C080_e	-1000	1000
Exp_AAE_C100	Alkyl-Acetate Ester (n-C100) facilitated export	AAE_C100_c <=> AAE_C100_e	-1000	1000
Exp_AAE_C101	Alkyl-Acetate Ester (n-C101) facilitated export	AAE_C101_c <=> AAE_C101_e	-1000	1000
Exp_AAE_C120	Alkyl-Acetate Ester (n-C120) facilitated export	AAE_C120_c <=> AAE_C120_e	-1000	1000
Exp_AAE_C121	Alkyl-Acetate Ester (n-C121) facilitated export	AAE_C121_c <=> AAE_C121_e	-1000	1000
Exp_AAE_C140	Alkyl-Acetate Ester (n-C140) facilitated export	AAE_C140_c <=> AAE_C140_e	-1000	1000
Exp_AAE_C141	Alkyl-Acetate Ester (n-C141) facilitated export	AAE_C141_c <=> AAE_C141_e	-1000	1000
Exp_AAE_C160	Alkyl-Acetate Ester (n-C160) facilitated export	AAE_C160_c <=> AAE_C160_e	-1000	1000
Exp_AAE_C161	Alkyl-Acetate Ester (n-C161) facilitated export	AAE_C161_c <=> AAE_C161_e	-1000	1000
Exp_AAE_C180	Alkyl-Acetate Ester (n-C180) facilitated export	AAE_C180_c <=> AAE_C180_e	-1000	1000
Exp_AAE_C181	Alkyl-Acetate Ester (n-C181) facilitated export	AAE_C181_c <=> AAE_C181_e	-1000	1000
EX_AAE_C040_LPAREN_e_RPAREN_	Alkyl-Acetate Ester (n-C040) Exchange	AAE_C040_e -->	0	1000
EX_AAE_C060_LPAREN_e_RPAREN_	Alkyl-Acetate Ester (n-C060) Exchange	AAE_C060_e -->	0	1000
EX_AAE_C080_LPAREN_e_RPAREN_	Alkyl-Acetate Ester (n-C080) Exchange	AAE_C080_e -->	0	1000
EX_AAE_C100_LPAREN_e_RPAREN_	Alkyl-Acetate Ester (n-C100) Exchange	AAE_C100_e -->	0	1000
EX_AAE_C101_LPAREN_e_RPAREN_	Alkyl-Acetate Ester (n-C101) Exchange	AAE_C101_e -->	0	1000
EX_AAE_C120_LPAREN_e_RPAREN_	Alkyl-Acetate Ester (n-C120) Exchange	AAE_C120_e -->	0	1000
EX_AAE_C121_LPAREN_e_RPAREN_	Alkyl-Acetate Ester (n-C121) Exchange	AAE_C121_e -->	0	1000
EX_AAE_C140_LPAREN_e_RPAREN_	Alkyl-Acetate Ester (n-C140) Exchange	AAE_C140_e -->	0	1000
EX_AAE_C141_LPAREN_e_RPAREN_	Alkyl-Acetate Ester (n-C141) Exchange	AAE_C141_e -->	0	1000
EX_AAE_C160_LPAREN_e_RPAREN_	Alkyl-Acetate Ester (n-C160) Exchange	AAE_C160_e -->	0	1000
EX_AAE_C161_LPAREN_e_RPAREN_	Alkyl-Acetate Ester (n-C161) Exchange	AAE_C161_e -->	0	1000
EX_AAE_C180_LPAREN_e_RPAREN_	Alkyl-Acetate Ester (n-C180) Exchange	AAE_C180_e -->	0	1000
EX_AAE_C181_LPAREN_e_RPAREN_	Alkyl-Acetate Ester (n-C181) Exchange	AAE_C181_e -->	0	1000
MK_C040	Methyl Ketone Synthesis for Acetone	aacoa_c + h2o_c --> MK_C040_c + co2_c + coa_c	0	1000
MK_C060	Methyl Ketone Synthesis for Methyl-Propyl Ketone	3ohcoa_c + h2o_c --> MK_C060_c + co2_c + coa_c	0	1000
MK_C080	Methyl Ketone Synthesis for Methyl-Pentyl Ketone	3oocoa_c + h2o_c --> MK_C080_c + co2_c + coa_c	0	1000
MK_C100	Methyl Ketone Synthesis for Methyl-Heptyl Ketone	3odcoa_c + h2o_c --> MK_C100_c + co2_c + coa_c	0	1000
MK_C120	Methyl Ketone Synthesis for Methyl-Nonyl Ketone	3oddcoa_c + h2o_c --> MK_C120_c + co2_c + coa_c	0	1000
MK_C140	Methyl Ketone Synthesis for Methyl-Undecyl Ketone	3otdcoa_c + h2o_c --> MK_C140_c + co2_c + coa_c	0	1000
MK_C160	Methyl Ketone Synthesis for Methyl-Tridecyl Ketone	3ohdcoa_c + h2o_c --> MK_C160_c + co2_c + coa_c	0	1000
MK_C180	Methyl Ketone Synthesis for Methyl-Pentadecyl Ketone	3ohodcoa_c + h2o_c --> MK_C180_c + co2_c + coa_c	0	1000
Exp_MK_C040	Acetone facilitated export	MK_C040_c <=> MK_C040_e	-1000	1000
Exp_MK_C060	Methyl-Propyl Ketone facilitated export	MK_C060_c <=> MK_C060_e	-1000	1000
Exp_MK_C080	Methyl-Pentyl Ketone facilitated export	MK_C080_c <=> MK_C080_e	-1000	1000
Exp_MK_C100	Methyl-Heptyl Ketone facilitated export	MK_C100_c <=> MK_C100_e	-1000	1000
Exp_MK_C120	Methyl-Nonyl Ketone facilitated export	MK_C120_c <=> MK_C120_e	-1000	1000
Exp_MK_C140	Methyl-Undecyl Ketone facilitated export	MK_C140_c <=> MK_C140_e	-1000	1000
Exp_MK_C160	Methyl-Tridecyl Ketone facilitated export	MK_C160_c <=> MK_C160_e	-1000	1000
Exp_MK_C180	Methyl-Pentadecyl Ketone facilitated export	MK_C180_c <=> MK_C180_e	-1000	1000
EX_MK_C040_LPAREN_e_RPAREN_	Acetone exchange	MK_C040_e -->	0	1000
EX_MK_C060_LPAREN_e_RPAREN_	Methyl-Propyl Ketone exchange	MK_C060_e -->	0	1000
EX_MK_C080_LPAREN_e_RPAREN_	Methyl-Pentyl Ketone exchange	MK_C080_e -->	0	1000
EX_MK_C100_LPAREN_e_RPAREN_	Methyl-Heptyl Ketone exchange	MK_C100_e -->	0	1000
EX_MK_C120_LPAREN_e_RPAREN_	Methyl-Nonyl Ketone exchange	MK_C120_e -->	0	1000
EX_MK_C140_LPAREN_e_RPAREN_	Methyl-Undecyl Ketone exchange	MK_C140_e -->	0	1000
EX_MK_C160_LPAREN_e_RPAREN_	Methyl-Tridecyl Ketone exchange	MK_C160_e -->	0	1000
EX_MK_C180_LPAREN_e_RPAREN_	Methyl-Pentadecyl Ketone exchange	MK_C180_e -->	0	1000
PHA_C040	Monomer Synthesis for Polyhydroxybutyrate	3hbcoa_c --> PHA_C040_c + coa_c	0	1000
PHA_C060	Monomer Synthesis for Polyhydroxyhexanoate	3hhcoa_c --> PHA_C060_c + coa_c	0	1000
PHA_C080	Monomer Synthesis for Polyhydroxyoctanoate	3hocoa_c --> PHA_C080_c + coa_c	0	1000
PHA_C100	Monomer Synthesis for Polyhydroxydecanoate	3hdcoa_c --> PHA_C100_c + coa_c	0	1000
PHA_C120	Monomer Synthesis for Polyhydroxydodecanoate	3hddcoa_c --> PHA_C120_c + coa_c	0	1000
PHA_C140	Monomer Synthesis for Polyhydroxytetradecanoate	3htdcoa_c --> PHA_C140_c + coa_c	0	1000
PHA_C160	Monomer Synthesis for Polyhydroxyhexadecanoate	3hhdcoa_c --> PHA_C160_c + coa_c	0	1000
PHA_C180	Monomer Synthesis for Polyhydroxyoctadecanoate	3hodcoa_c --> PHA_C180_c + coa_c	0	1000
Exp_PHA_C040	Polyhydroxybutyrate incorporation into grannules	PHA_C040_c <=> PHA_C040_e	-1000	1000
Exp_PHA_C060	Polyhydroxyhexanoate incorporation into grannules	PHA_C060_c <=> PHA_C060_e	-1000	1000
Exp_PHA_C080	Polyhydroxyoctanoate incorporation into grannules	PHA_C080_c <=> PHA_C080_e	-1000	1000
Exp_PHA_C100	Polyhydroxydecanoate incorporation into grannules	PHA_C100_c <=> PHA_C100_e	-1000	1000
Exp_PHA_C120	Polyhydroxydodecanoate incorporation into grannules	PHA_C120_c <=> PHA_C120_e	-1000	1000
Exp_PHA_C140	Polyhydroxytetradecanoate incorporation into grannules	PHA_C140_c <=> PHA_C140_e	-1000	1000
Exp_PHA_C160	Polyhydroxyhexadecanoate incorporation into grannules	PHA_C160_c <=> PHA_C160_e	-1000	1000
Exp_PHA_C180	Polyhydroxyoctadecanoate incorporation into grannules	PHA_C180_c <=> PHA_C180_e	-1000	1000
EX_PHA_C040_LPAREN_e_RPAREN_	Polyhydroxybutyrate exchange	PHA_C040_e -->	0	1000
EX_PHA_C060_LPAREN_e_RPAREN_	Polyhydroxyhexanoate exchange	PHA_C060_e -->	0	1000
EX_PHA_C080_LPAREN_e_RPAREN_	Polyhydroxyoctanoate exchange	PHA_C080_e -->	0	1000
EX_PHA_C100_LPAREN_e_RPAREN_	Polyhydroxydecanoate exchange	PHA_C100_e -->	0	1000
EX_PHA_C120_LPAREN_e_RPAREN_	Polyhydroxydodecanoate exchange	PHA_C120_e -->	0	1000
EX_PHA_C140_LPAREN_e_RPAREN_	Polyhydroxytetradecanoate exchange	PHA_C140_e -->	0	1000
EX_PHA_C160_LPAREN_e_RPAREN_	Polyhydroxyhexadecanoate exchange	PHA_C160_e -->	0	1000
EX_PHA_C180_LPAREN_e_RPAREN_	Polyhydroxyoctadecanoate exchange	PHA_C180_e -->	0	1000
PhaG6	3-Hydroxyhexanoyl-ACP acyl-ACP:CoA transferase	3hhexACP_c + coa_c --> 3hhcoa_c + ACP_c	0	1000
PhaG8	3-Hydroxyoctanoly-ACP acyl-ACP:CoA transferase	3hoctACP_c + coa_c --> 3hocoa_c + ACP_c	0	1000
PhaG10	3-Hydroxyoctanoyl-ACP acyl-ACP:CoA transferase	3hdecACP_c + coa_c --> 3hdcoa_c + ACP_c	0	1000
PhaG12	3-Hydroxydodecanoyl-ACP acyl-ACP:CoA transferase	3hddecACP_c + coa_c --> 3hddcoa_c + ACP_c	0	1000
PhaG14	3-Hydroxytetradecanoyl-ACP acyl-ACP:CoA transferase	3hmrsACP_c + coa_c --> 3htdcoa_c + ACP_c	0	1000
PhaG16	3-Hydroxyhexadecanoyl-ACP acyl-ACP:CoA transferase	3hpalmACP_c + coa_c --> 3hhdcoa_c + ACP_c	0	1000

## Sheet: Metabolites
	Description	Formula	Charge	Compartment
FFA_C101_c	Decenoate (n-C10:1)	C10H17O2	-1	c
FFA_C121_c	Dodecenoate (n-C12:1)	C12H21O2	-1	c
FFA_C101_e	Decenoate (n-C10:1)	C10H17O2	-1	e
FFA_C121_e	Dodecenoate (n-C12:1)	C12H21O2	-1	e
FFA_C121_p	Dodecenoate (n-C12:1)	C12H21O2	-1	p
FFA_C101_p	Decenoate (n-C10:1)	C10H17O2	-1	p
Ald_C040_c	Fatty Aldehyde (n-C4:0)	C4H8O1	0	c
Ald_C060_c	Fatty Aldehyde (n-C6:0)	C6H12O1	0	c
Ald_C080_c	Fatty Aldehyde (n-C8:0)	C8H16O1	0	c
Ald_C100_c	Fatty Aldehyde (n-C10:0)	C10H20O1	0	c
dc3coa_c	cis-Dec-3-enoyl-CoA	C31H48N7O17P3S	-4	c
Ald_C101_c	Fatty Aldehyde (n-C10:1)	C10H18O1	0	c
Ald_C120_c	Fatty Aldehyde (n-C12:0)	C12H24O1	0	c
dd3coa_c	cis-Dodec-3-enoyl-CoA	C33H52N7O17P3S	-4	c
Ald_C121_c	Fatty Aldehyde (n-C12:1)	C12H22O1	0	c
Ald_C140_c	Fatty Aldehyde (n-C14:0)	C14H28O1	0	c
Ald_C141_c	Fatty Aldehyde (n-C14:1)	C14H26O1	0	c
Ald_C160_c	Fatty Aldehyde (n-C16:0)	C16H32O1	0	c
Ald_C161_c	Fatty Aldehyde (n-C16:1)	C16H30O1	0	c
Ald_C180_c	Fatty Aldehyde (n-C18:0)	C18H36O1	0	c
Ald_C181_c	Fatty Aldehyde (n-C18:1)	C18H34O1	0	c
OH_C040_c	Fatty Alcohol (n-C4:0)	C4H10O	0	c
OH_C060_c	Fatty Alcohol (n-C6:0)	C6H14O	0	c
OH_C080_c	Fatty Alcohol (n-C8:0)	C8H18O	0	c
OH_C100_c	Fatty Alcohol (n-C10:0)	C10H22O	0	c
OH_C101_c	Fatty Alcohol (n-C10:1)	C10H20O	0	c
OH_C120_c	Fatty Alcohol (n-C12:0)	C12H26O	0	c
OH_C121_c	Fatty Alcohol (n-C12:1)	C12H24O	0	c
OH_C140_c	Fatty Alcohol (n-C14:0)	C14H30O	0	c
OH_C141_c	Fatty Alcohol (n-C14:1)	C14H28O	0	c
OH_C160_c	Fatty Alcohol (n-C16:0)	C16H34O	0	c
OH_C161_c	Fatty Alcohol (n-C16:1)	C16H32O	0	c
OH_C180_c	Fatty Alcohol (n-C18:0)	C18H38O	0	c
OH_C181_c	Fatty Alcohol (n-C18:1)	C18H36O	0	c
OH_C040_e	Fatty Alcohol (n-C4:0)	C4H10O	0	e
OH_C060_e	Fatty Alcohol (n-C6:0)	C6H14O	0	e
OH_C080_e	Fatty Alcohol (n-C8:0)	C8H18O	0	e
OH_C100_e	Fatty Alcohol (n-C10:0)	C10H22O	0	e
OH_C101_e	Fatty Alcohol (n-C10:1)	C10H20O	0	e
OH_C120_e	Fatty Alcohol (n-C12:0)	C12H26O	0	e
OH_C121_e	Fatty Alcohol (n-C12:1)	C12H24O	0	e
OH_C140_e	Fatty Alcohol (n-C14:0)	C14H30O	0	e
OH_C141_e	Fatty Alcohol (n-C14:1)	C14H28O	0	e
OH_C160_e	Fatty Alcohol (n-C16:0)	C16H34O	0	e
OH_C161_e	Fatty Alcohol (n-C16:1)	C16H32O	0	e
OH_C180_e	Fatty Alcohol (n-C18:0)	C18H38O	0	e
OH_C181_e	Fatty Alcohol (n-C18:1)	C18H36O	0	e
EE_C040_c	Ethyl Ester (n-C4:0)	C6H12O2	0	c
EE_C060_c	Ethyl Ester (n-C6:0)	C8H16O2	0	c
EE_C080_c	Ethyl Ester (n-C8:0)	C10H20O2	0	c
EE_C100_c	Ethyl Ester (n-C10:0)	C12H24O2	0	c
EE_C101_c	Ethyl Ester (n-C10:1)	C12H22O2	0	c
EE_C120_c	Ethyl Ester (n-C12:0)	C14H28O2	0	c
EE_C121_c	Ethyl Ester (n-C12:1)	C14H26O2	0	c
EE_C140_c	Ethyl Ester (n-C14:0)	C16H32O2	0	c
EE_C141_c	Ethyl Ester (n-C14:1)	C16H30O2	0	c
EE_C160_c	Ethyl Ester (n-C16:0)	C18H36O2	0	c
EE_C161_c	Ethyl Ester (n-C16:1)	C18H34O2	0	c
EE_C180_c	Ethyl Ester (n-C18:0)	C20H40O2	0	c
EE_C181_c	Ethyl Ester (n-C18:1)	C20H38O2	0	c
EE_C040_e	Ethyl Ester (n-C4:0)	C6H12O2	0	e
EE_C060_e	Ethyl Ester (n-C6:0)	C8H16O2	0	e
EE_C080_e	Ethyl Ester (n-C8:0)	C10H20O2	0	e
EE_C100_e	Ethyl Ester (n-C10:0)	C12H24O2	0	e
EE_C101_e	Ethyl Ester (n-C10:1)	C12H22O2	0	e
EE_C120_e	Ethyl Ester (n-C12:0)	C14H28O2	0	e
EE_C121_e	Ethyl Ester (n-C12:1)	C14H26O2	0	e
EE_C140_e	Ethyl Ester (n-C14:0)	C16H32O2	0	e
EE_C141_e	Ethyl Ester (n-C14:1)	C16H30O2	0	e
EE_C160_e	Ethyl Ester (n-C16:0)	C18H36O2	0	e
EE_C161_e	Ethyl Ester (n-C16:1)	C18H34O2	0	e
EE_C180_e	Ethyl Ester (n-C18:0)	C20H40O2	0	e
EE_C181_e	Ethyl Ester (n-C18:1)	C20H38O2	0	e
alk_C040_c	Alkane (n-C4:0)	C3H8	0	c
alk_C060_c	Alkane (n-C6:0)	C5H12	0	c
alk_C080_c	Alkane (n-C8:0)	C7H16	0	c
alk_C100_c	Alkane (n-C10:0)	C9H20	0	c
alk_C101_c	Alkane (n-C10:1)	C9H18	0	c
alk_C120_c	Alkane (n-C12:0)	C11H24	0	c
alk_C121_c	Alkane (n-C12:1)	C11H22	0	c
alk_C140_c	Alkane (n-C14:0)	C13H28	0	c
alk_C141_c	Alkane (n-C14:1)	C13H26	0	c
alk_C160_c	Alkane (n-C16:0)	C15H32	0	c
alk_C161_c	Alkane (n-C16:1)	C15H30	0	c
alk_C180_c	Alkane (n-C18:0)	C17H36	0	c
alk_C181_c	Alkane (n-C18:1)	C17H34	0	c
alk_C040_e	Alkane (n-C4:0)	C3H8	0	e
alk_C060_e	Alkane (n-C6:0)	C5H12	0	e
alk_C080_e	Alkane (n-C8:0)	C7H16	0	e
alk_C100_e	Alkane (n-C10:0)	C9H20	0	e
alk_C101_e	Alkane (n-C10:1)	C9H18	0	e
alk_C120_e	Alkane (n-C12:0)	C11H24	0	e
alk_C121_e	Alkane (n-C12:1)	C11H22	0	e
alk_C140_e	Alkane (n-C14:0)	C13H28	0	e
alk_C141_e	Alkane (n-C14:1)	C13H26	0	e
alk_C160_e	Alkane (n-C16:0)	C15H32	0	e
alk_C161_e	Alkane (n-C16:1)	C15H30	0	e
alk_C180_e	Alkane (n-C18:0)	C17H36	0	e
alk_C181_e	Alkane (n-C18:1)	C17H34	0	e
ME_C040_c	FAME (n-C4:0)	C5H10O2	0	c
ME_C060_c	FAME (n-C6:0)	C7H14O2	0	c
ME_C080_c	FAME (n-C8:0)	C9H18O2	0	c
ME_C100_c	FAME (n-C10:0)	C11H22O2	0	c
ME_C101_c	FAME (n-C10:1)	C11H20O2	0	c
ME_C120_c	FAME (n-C12:0)	C13H26O2	0	c
ME_C121_c	FAME (n-C12:1)	C13H24O2	0	c
ME_C140_c	FAME (n-C14:0)	C15H30O2	0	c
ME_C141_c	FAME (n-C14:1)	C15H28O2	0	c
ME_C160_c	FAME (n-C16:0)	C17H34O2	0	c
ME_C161_c	FAME (n-C16:1)	C17H32O2	0	c
ME_C180_c	FAME (n-C18:0)	C19H38O2	0	c
ME_C181_c	FAME (n-C18:1)	C19H36O2	0	c
ME_C040_e	FAME (n-C4:0)	C5H10O2	0	e
ME_C060_e	FAME (n-C6:0)	C7H14O2	0	e
ME_C080_e	FAME (n-C8:0)	C9H18O2	0	e
ME_C100_e	FAME (n-C10:0)	C11H22O2	0	e
ME_C101_e	FAME (n-C10:1)	C11H20O2	0	e
ME_C120_e	FAME (n-C12:0)	C13H26O2	0	e
ME_C121_e	FAME (n-C12:1)	C13H24O2	0	e
ME_C140_e	FAME (n-C14:0)	C15H30O2	0	e
ME_C141_e	FAME (n-C14:1)	C15H28O2	0	e
ME_C160_e	FAME (n-C16:0)	C17H34O2	0	e
ME_C161_e	FAME (n-C16:1)	C17H32O2	0	e
ME_C180_e	FAME (n-C18:0)	C19H38O2	0	e
ME_C181_e	FAME (n-C18:1)	C19H36O2	0	e
AAE_C040_c	Akyl-Acetate Ester (n-C4:0)	C6H12O2	0	c
AAE_C060_c	Akyl-Acetate Ester (n-C6:0)	C8H16O2	0	c
AAE_C080_c	Akyl-Acetate Ester (n-C8:0)	C10H20O2	0	c
AAE_C100_c	Akyl-Acetate Ester (n-C10:0)	C12H24O2	0	c
AAE_C101_c	Akyl-Acetate Ester (n-C10:1)	C12H22O2	0	c
AAE_C120_c	Akyl-Acetate Ester (n-C12:0)	C14H28O2	0	c
AAE_C121_c	Akyl-Acetate Ester (n-C12:1)	C14H26O2	0	c
AAE_C140_c	Akyl-Acetate Ester (n-C14:0)	C16H32O2	0	c
AAE_C141_c	Akyl-Acetate Ester (n-C14:1)	C16H30O2	0	c
AAE_C160_c	Akyl-Acetate Ester (n-C16:0)	C18H36O2	0	c
AAE_C161_c	Akyl-Acetate Ester (n-C16:1)	C18H34O2	0	c
AAE_C180_c	Akyl-Acetate Ester (n-C18:0)	C20H40O2	0	c
AAE_C181_c	Akyl-Acetate Ester (n-C18:1)	C20H38O2	0	c
AAE_C040_e	Akyl-Acetate Ester (n-C4:0)	C6H12O2	0	e
AAE_C060_e	Akyl-Acetate Ester (n-C6:0)	C8H16O2	0	e
AAE_C080_e	Akyl-Acetate Ester (n-C8:0)	C10H20O2	0	e
AAE_C100_e	Akyl-Acetate Ester (n-C10:0)	C12H24O2	0	e
AAE_C101_e	Akyl-Acetate Ester (n-C10:1)	C12H22O2	0	e
AAE_C120_e	Akyl-Acetate Ester (n-C12:0)	C14H28O2	0	e
AAE_C121_e	Akyl-Acetate Ester (n-C12:1)	C14H26O2	0	e
AAE_C140_e	Akyl-Acetate Ester (n-C14:0)	C16H32O2	0	e
AAE_C141_e	Akyl-Acetate Ester (n-C14:1)	C16H30O2	0	e
AAE_C160_e	Akyl-Acetate Ester (n-C16:0)	C18H36O2	0	e
AAE_C161_e	Akyl-Acetate Ester (n-C16:1)	C18H34O2	0	e
AAE_C180_e	Akyl-Acetate Ester (n-C18:0)	C20H40O2	0	e
AAE_C181_e	Akyl-Acetate Ester (n-C18:1)	C20H38O2	0	e
MK_C040_c	Acetone	C3H6O	0	c
MK_C060_c	Methyl-Propyl Ketone	C5H10O	0	c
MK_C080_c	Methyl-Pentyl Ketone	C7H14O	0	c
MK_C100_c	Methyl-Heptyl Ketone	C9H18O	0	c
MK_C120_c	Methyl-Nonyl Ketone	C11H22O	0	c
MK_C140_c	Methyl-Undecyl Ketone	C13H26O	0	c
MK_C160_c	Methyl-Tridecyl Ketone	C15H30O	0	c
3oodcoa_c	3-Oxooctadecanoyl-CoA	C39H64N7O18P3S	0	c
MK_C180_c	Methyl-Pentadecyl Ketone	C17H34O	0	c
MK_C040_e	Acetone	C3H6O	0	e
MK_C060_e	Methyl-Propyl Ketone	C5H10O	0	e
MK_C080_e	Methyl-Pentyl Ketone	C7H14O	0	e
MK_C100_e	Methyl-Heptyl Ketone	C9H18O	0	e
MK_C120_e	Methyl-Nonyl Ketone	C11H22O	0	e
MK_C140_e	Methyl-Undecyl Ketone	C13H26O	0	e
MK_C160_e	Methyl-Tridecyl Ketone	C15H30O	0	e
MK_C180_e	Methyl-Pentadecyl Ketone	C17H34O	0	e
PHA_C040_c	Polyhydroxybutyrate	C4H6O2	0	c
PHA_C060_c	Polyhydroxyhexanoate	C6H10O2	0	c
PHA_C080_c	Polyhydroxyoctanoate	C8H14O2	0	c
PHA_C100_c	Polyhydroxydecanoate	C10H18O2	0	c
PHA_C120_c	Polyhydroxydodecanoate	C12H22O2	0	c
PHA_C140_c	Polyhydroxytetradecanoate	C14H26O2	0	c
PHA_C160_c	Polyhydroxyhexadecanoate	C16H30O2	0	c
PHA_C180_c	Polyhydroxyoctadecanoate	C18H34O2	0	c
PHA_C040_e	Polyhydroxybutyrate	C4H6O2	0	e
PHA_C060_e	Polyhydroxyhexanoate	C6H10O2	0	e
PHA_C080_e	Polyhydroxyoctanoate	C8H14O2	0	e
PHA_C100_e	Polyhydroxydecanoate	C10H18O2	0	e
PHA_C120_e	Polyhydroxydodecanoate	C12H22O2	0	e
PHA_C140_e	Polyhydroxytetradecanoate	C14H26O2	0	e
PHA_C160_e	Polyhydroxyhexadecanoate	C16H30O2	0	e
PHA_C180_e	Polyhydroxyoctadecanoate	C18H34O2	0	e
